# Supplementary material for: Synthesis, characterization and applications of metallic nanoparticles/rGO blended poly methyl methacrylate membranes for the efficient removal of Cd2+ from model and real wastewater
Source: Royal Society of Chemistry journal article supplement (doi:10.1039/d0nj02590a), 2020-01-01
Supplement: d0nj02590a1.pdf [file d0nj02590a1.pdf]

## Supporting information

### Synthesis, Characterization and Testing of Metallic Nanoparticles/rGO blend Poly methyl methacrylate Membranes for the Effective Removal of Cd<sup>2+</sup> from Model and Effluent Water

Maria<sup>1</sup>, Muhammad Yaseen<sup>1\*</sup>, Muhammad Usman Farooq<sup>2</sup>, Sidra Subhan<sup>1</sup>, Fazle Subhan<sup>3</sup>

<sup>1</sup> Institute of Chemical Sciences, University of Peshawar, 25120, KP, Pakistan.

<sup>2</sup> Department of Chemical Engineering, Ghulam Ishaq Khan Institute of Engineering Sciences & Technology, Topi, Swabi, KP, Pakistan.

<sup>3</sup> Department of Chemistry, Abdul Wali Khan University, Mardan, KP, Pakistan.

Corresponding author: Muhammad Yaseen

Email: [myyousafzai@gmail.com](mailto:myyousafzai@gmail.com)

[myyousafzai@uop.edu.pk](mailto:myyousafzai@uop.edu.pk)

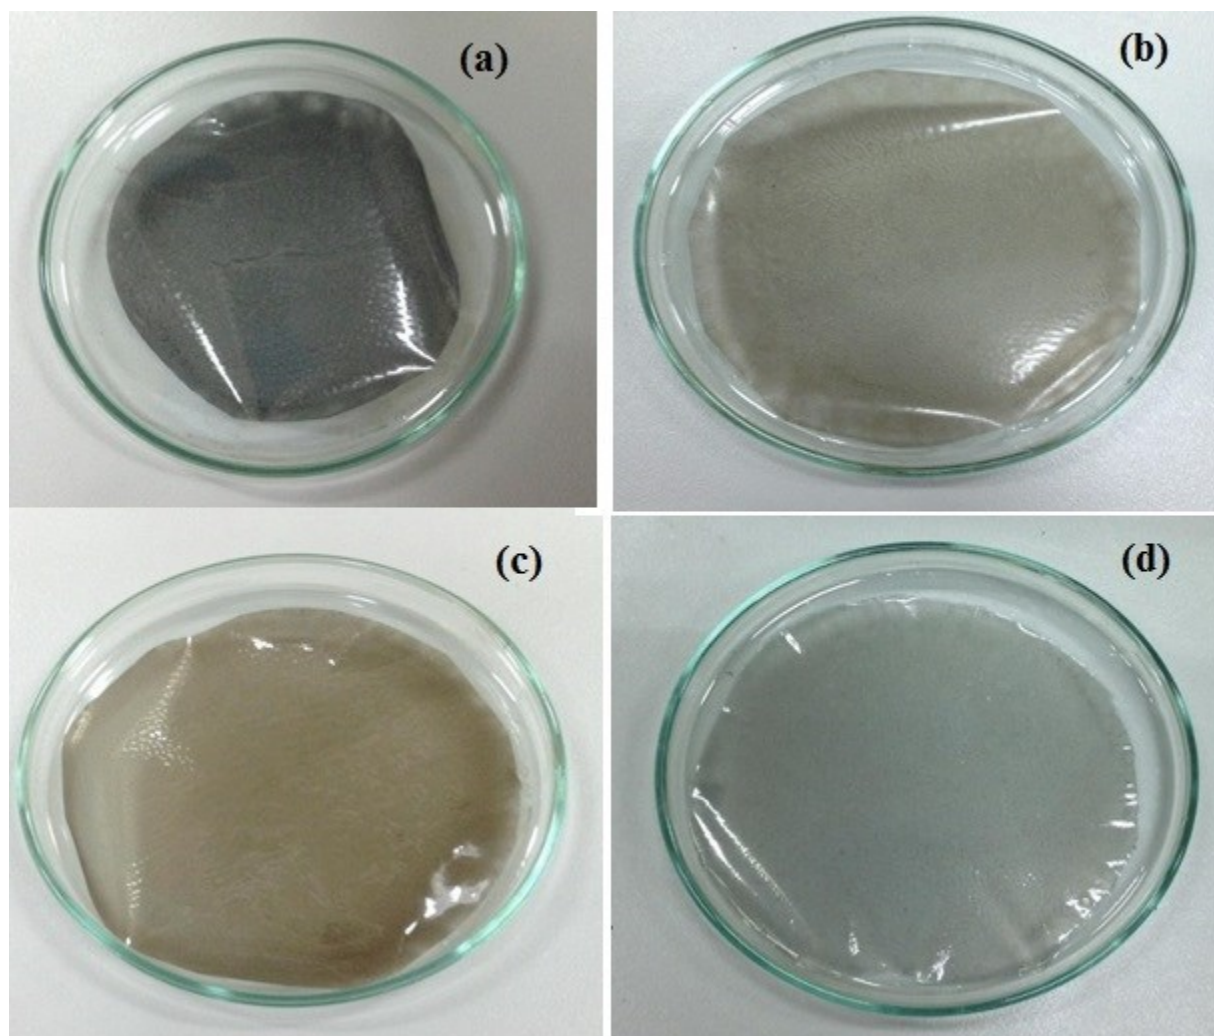

**Figure S1:** Images of various synthesized PMMA/rGO/Ag<sub>2</sub>O (1a); PMMA/rGO/CuO (b); PMMA/rGO/Fe<sub>2</sub>O<sub>3</sub> (c); PMMA/rGO/ZnO (d) membranes.

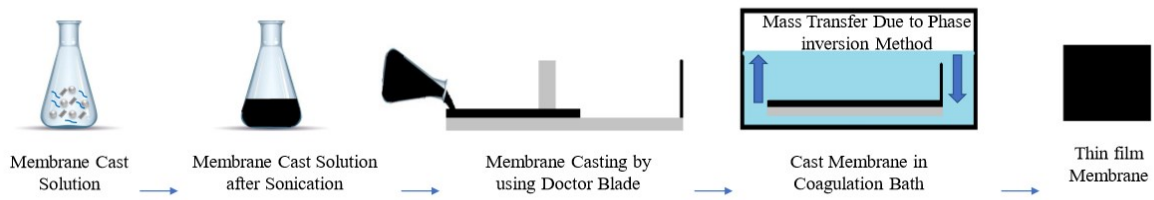

Diagrammatic Presentation of Doctor Blading and Phase Inversion Method

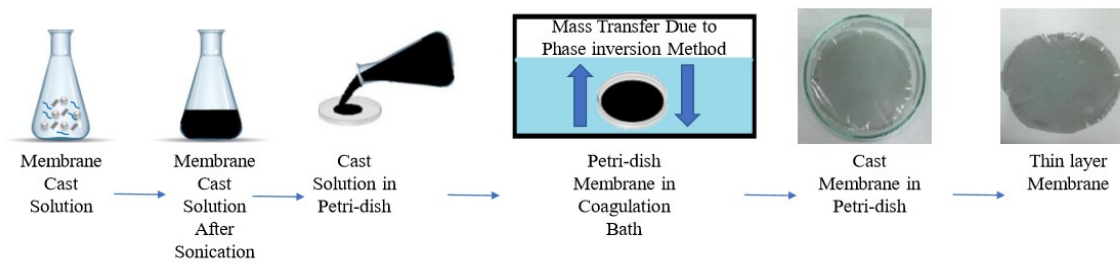

Diagrammatic Presentation of Phase Inversion Method in Petri-dish

**Figure S2:** Phase Inversion method Types: Doctor Blading (a); Petri-Dish method (b).

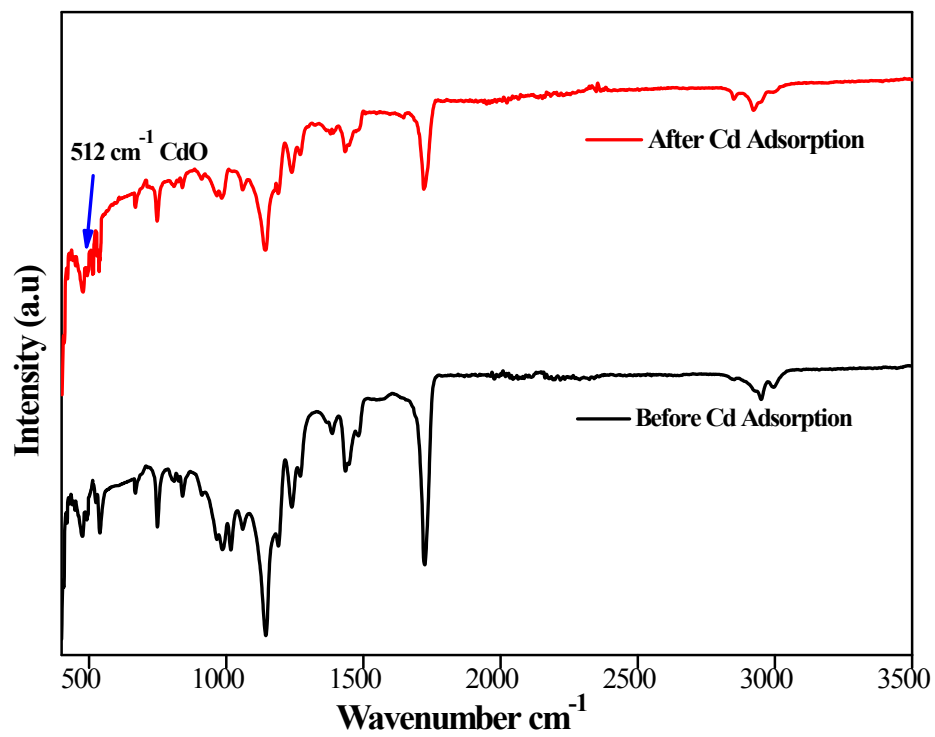

**Figure S3:** FTIR spectra of PMMA/rGO/Ag<sub>2</sub>O membranes before and after Cd<sup>2+</sup> ions removal from waste tonner.

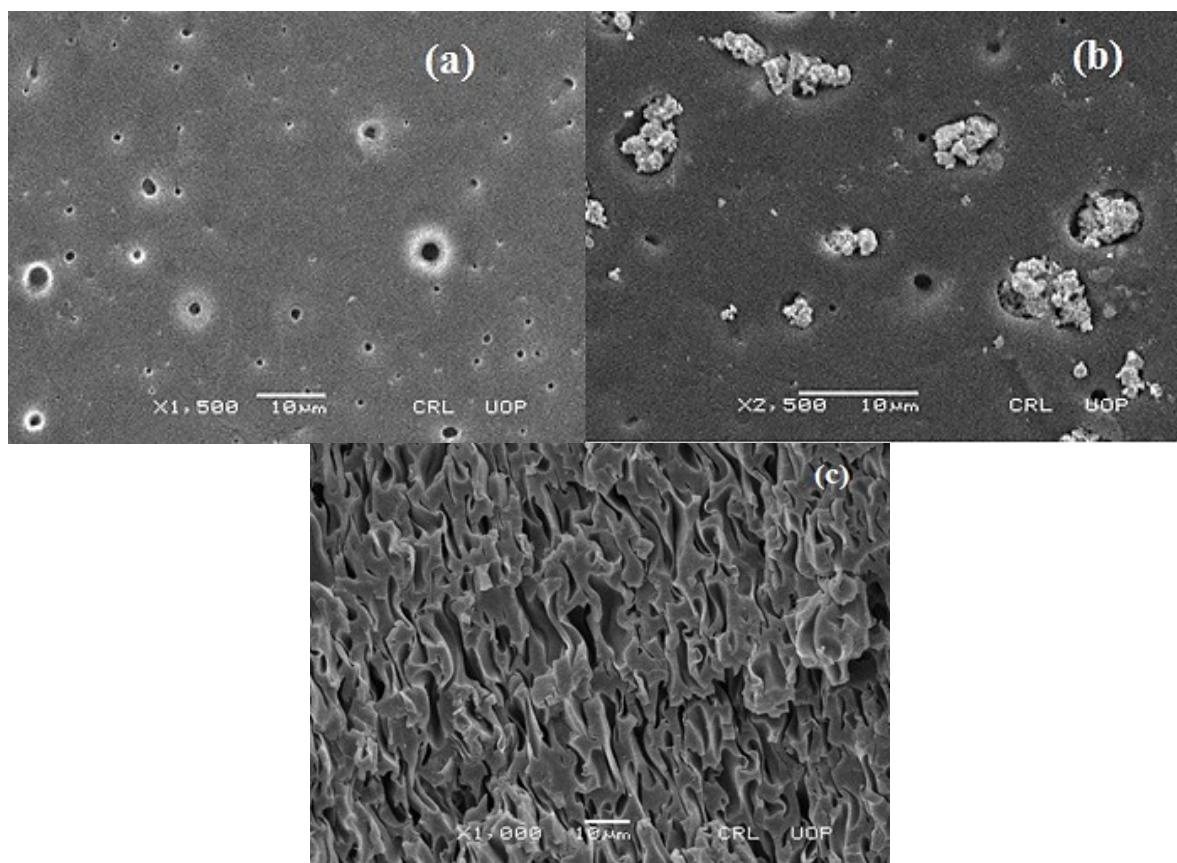

**Figure S4:** SEM images of PMMA/rGO/Ag<sub>2</sub>O membrane: (a) before and (b) after extraction of Cd<sup>2+</sup> ions from real sample (tonner), and (c) represents the cross sectional image

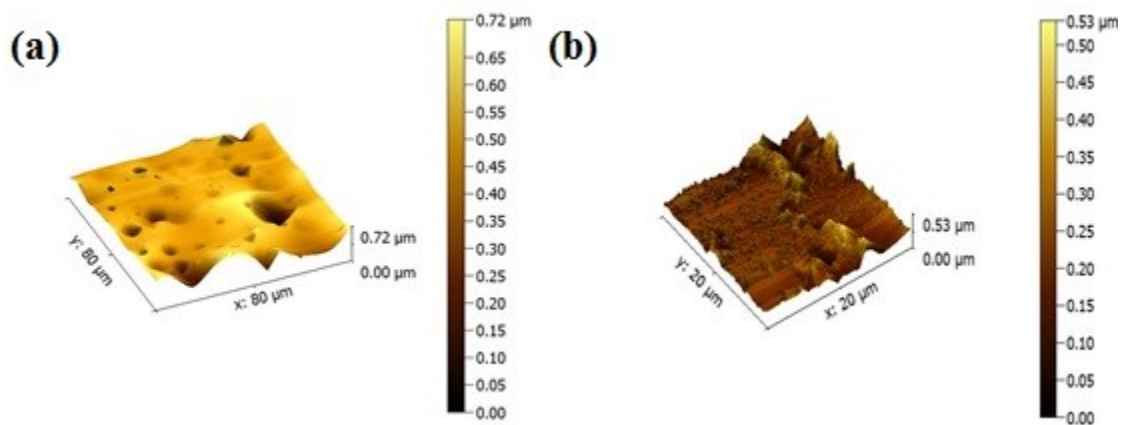

**Figure S5:** AFM 3-D image of PMMA/rGO/Ag<sub>2</sub>O membrane: (a) before and (b) after extraction of Cd<sup>2+</sup> ions from real sample (tonner)

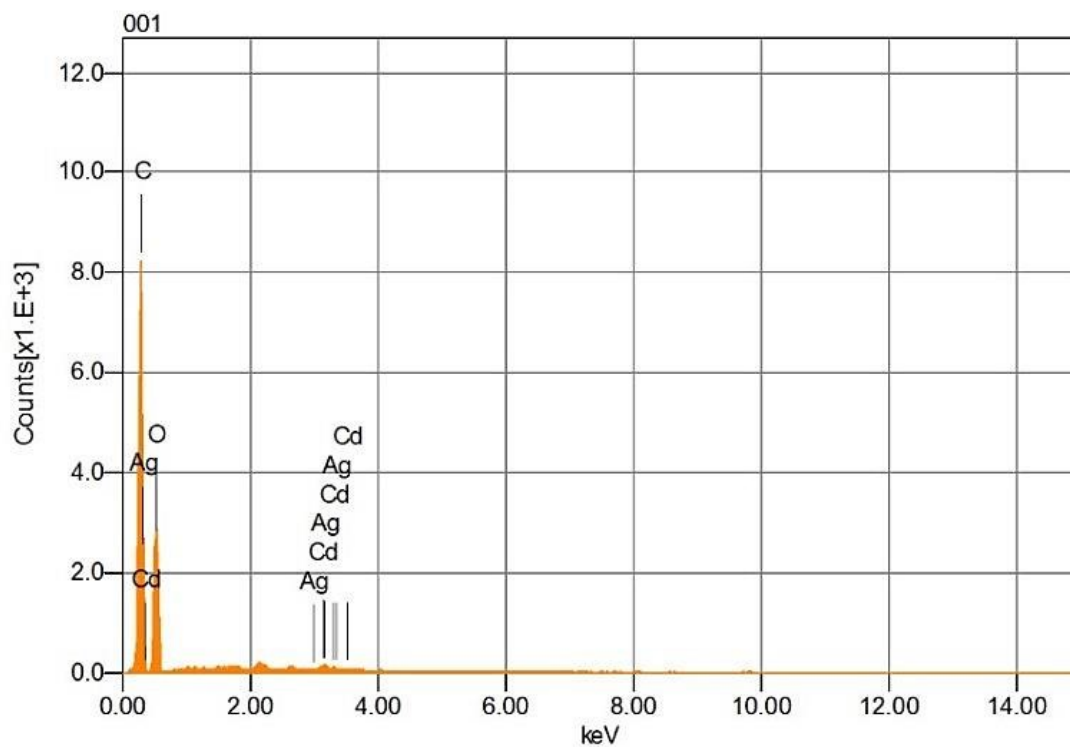

**Figure S6:** EDX analysis for Cd<sup>2+</sup> ion removal from waste water (tonner) after extraction using PMMA/rGO/Ag<sub>2</sub>O membrane

**Table S1:** Composition of PMMA, rGO and metallic nanoparticles incorporated hybrid membranes.

**1a: PMMA/rGO/Ag<sub>2</sub>O**

| Membrane Code | Polymer (PMMA) | Fillers |                   | Solvent        | Time of evaporation (mins) |
|---------------|----------------|---------|-------------------|----------------|----------------------------|
|               |                | rGO     | Ag <sub>2</sub> O | Acetone (wt.%) |                            |
| M1            | 0.5            | 0.1     | 0.4               | 99             | 8.5                        |
| M2            | 1              | 0.2     | 0.8               | 98             | 7.5                        |
| M3            | 1.5            | 0.5     | 1                 | 97             | 7                          |
| M4            | 2              | 0.8     | 1.2               | 96             | 6.5                        |
| M5            | 2.5            | 1       | 1.5               | 95             | 5.5                        |

**1c: PMMA/rGO/Fe<sub>2</sub>O<sub>3</sub>**

| Membrane Code | Polymer (PMMA) | Fillers |                                | Solvent        | Time of evaporation (mins) |
|---------------|----------------|---------|--------------------------------|----------------|----------------------------|
|               |                | rGO     | Fe <sub>2</sub> O <sub>3</sub> | Acetone (wt.%) |                            |
| M6            | 0.5            | 0.1     | 0.4                            | 99             | 9                          |
| M7            | 1              | 0.2     | 0.8                            | 98             | 8.7                        |
| M8            | 1.5            | 0.5     | 1                              | 97             | 7.5                        |
| M9            | 2              | 0.8     | 1.2                            | 96             | 6.5                        |
| M10           | 2.5            | 1       | 1.5                            | 95             | 6                          |

**1b: PMMA/rGO/CuO**

| Membrane Code | Polymer (PMMA) | Fillers |     | Solvent        | Time of evaporation (mins) |
|---------------|----------------|---------|-----|----------------|----------------------------|
|               |                | rGO     | CuO | Acetone (wt.%) |                            |
| M11           | 0.5            | 0.1     | 0.4 | 99             | 11                         |
| M12           | 1              | 0.2     | 0.8 | 98             | 10                         |



|     |     |     |     |    |     |
|-----|-----|-----|-----|----|-----|
| M13 | 1.5 | 0.5 | 1   | 97 | 9.7 |
| M14 | 2   | 0.8 | 1.2 | 96 | 9   |
| M15 | 2.5 | 1   | 1.5 | 95 | 8.5 |

**1d: PMMA/rGO/ZnO**

| Membrane Code | Polymer (PMMA) | Fillers |     | Solvent        | Time of evaporation (mins) |
|---------------|----------------|---------|-----|----------------|----------------------------|
|               |                | rGO     | ZnO | Acetone (wt.%) |                            |
| M16           | 0.5            | 0.1     | 0.4 | 99             | 12                         |
| M17           | 1              | 0.2     | 0.8 | 98             | 11.5                       |
| M18           | 1.5            | 0.5     | 1   | 97             | 10                         |
| M19           | 2              | 0.8     | 1.2 | 96             | 9.7                        |
| M20           | 2.5            | 1       | 1.5 | 95             | 9                          |

**Table S2:** Composition of membrane casting solutions.

| Combination | PMMA<br>(g) | Acetone<br>(wt. %) | rGO<br>(g) | (Ag <sub>2</sub> O/Fe <sub>2</sub> O <sub>3</sub> /CuO/ZnO) NPs |
|-------------|-------------|--------------------|------------|-----------------------------------------------------------------|
|             |             |                    |            | (individually)<br>(g)                                           |
| C1          | 0.5         | 99                 | 0.1        | 0.4                                                             |
| C2          | 1.0         | 98                 | 0.2        | 0.8                                                             |
| C3          | 1.5         | 97                 | 0.5        | 1.0                                                             |
| C4          | 2.0         | 96                 | 0.8        | 1.2                                                             |
| C5          | 2.5         | 95                 | 1.0        | 1.5                                                             |
